# Supplementary material
Source: PubMed Central journal article supplement (PMC5763043)
Supplement: JB.00582-17_zjb003184630s1.pdf [file JB.00582-17_zjb003184630s1.pdf]

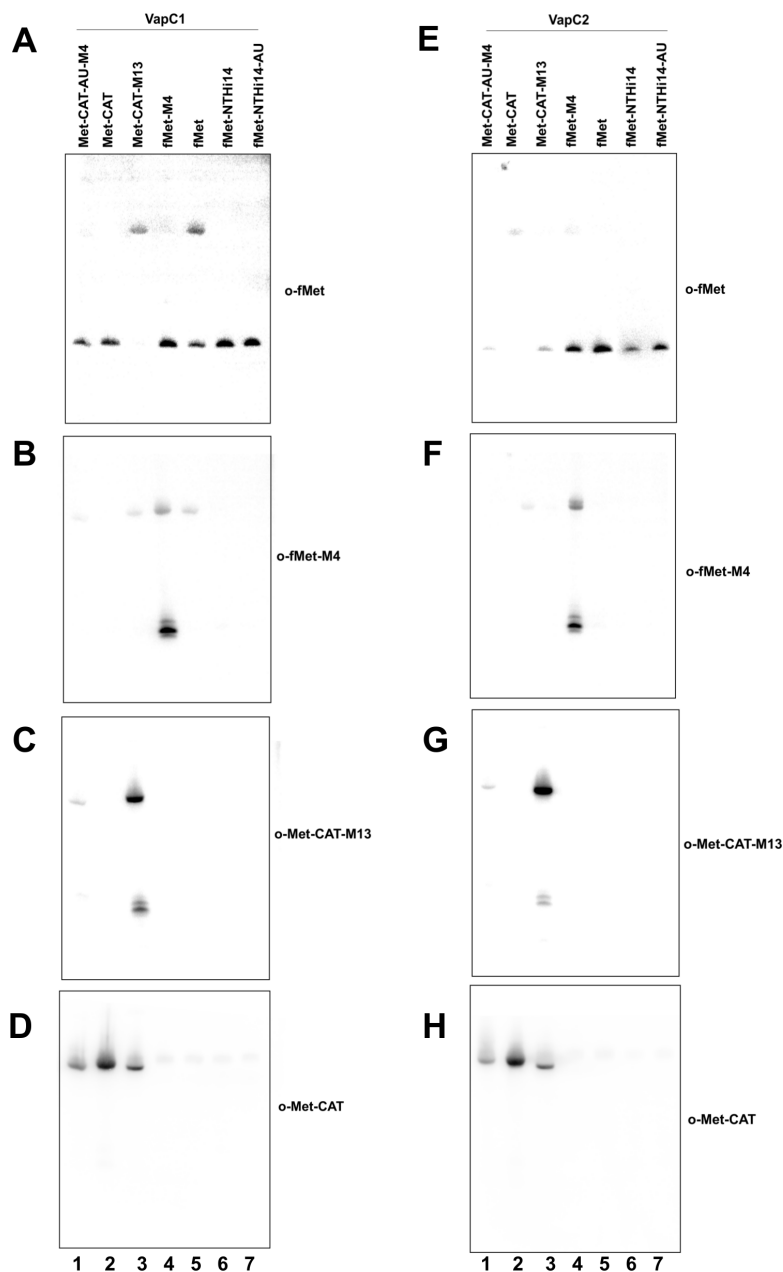

**Supplemental Figure 1.** Original Northern blots images used to produce Figure 7B. Differential hybridization Northern blot analysis of total RNA isolated from BL21(DE3) *E. coli* expressing VapC1 (A-D) or VapC2 (E-H) toxins and tRNAs as indicated, performed as described in Materials and Methods. The blots were hybridized with an oligonucleotide specific to each tRNA as indicated to the right of each panel (eg. o-fMet is oligonucleotide for tRNA<sup>fMet</sup>). The portions of each blot used to make Figure 7B are; Figure 7B lane 1 = S1D, lane 2; Figure 7B lane 2 = S1C, lane 3; Figure 7B lane 3 = S1B, lane 4; Figure 7B lane 4 = S1A, lane 5; Figure 7B lane 5 = S1H, lane 2; Figure 7B lane 6 = S1G, lane 3; Figure 7B lane 7 = S1F, lane 4; Figure 7B lane 8 = S1E, lane 5. Lanes 1,6 & 7 were not used to produce Figure 7.

**Table 1. Oligonucleotides used in this study.**

| <b>Oligonucleotide</b> | <b>Sequence</b>                     |
|------------------------|-------------------------------------|
| OSB829                 | CATGCCATGGCATGTTATATGTTAGACACC      |
| OSB830                 | GCTCTAGAGCTTTTGTCCAATCTTGCC         |
| OSB834                 | CATGCCATGGCATGTTTGAAATATATGCTTGATAC |
| OSB835                 | GCTCTAGAGCCACCCAATTTTCTGTACG        |
| OSB1103                | GCCCATGGGCCTGAAATTCATGCTTGATAC      |
| OSB1104                | GCTCTAGAGCTTAGCACCAGTCTTC           |
| OSB1233                | GAAGATCTTCGGGGGAGGCGGGGTGGAGTG      |
| OSB1234                | GGGGTACCCCTTATTTGTAGAGCTCATCCATGC   |
| OSB1289                | AAAGATCTTTAAAGCCTCACGCTCTGGTTG      |
| OSB1352                | CATGCCATGGCATGTGAAGCCTCTG           |
| OSB1385                | GTTCCCATGGGAACCAAAGTTTCCAGAGCGG     |
| OSB1386                | TGGGATCCCCAGATTTTACGTTCTGCGG        |
| 5' RNA-Seq Adaptor     | GUUCAGAGUUCUACAGUCCGACGAUC          |
| 3' RNA-Seq Adaptor     | /5rApp/TGGAATTCTCGGGTGCCAAGG/3ddC/  |
